# Supplementary material
Source: PubMed Central journal article supplement (PMC4542436)
Supplement: supp_db14-1790_DB141790SupplementaryData.pdf [file supp_db14-1790_DB141790SupplementaryData.pdf]

**Data Supplement*****Animals.***

Coronary artery disease (CAD) and metabolic syndrome (MetS) were induced in both treatment groups by feeding, once daily for 6 months, 1 kg of atherogenic diet, containing 16% kcal from protein, 41% kcal from complex carbohydrates, 19% kcal from fructose, and 43% kcal from fat, and supplemented with 2.0% cholesterol and 0.7% sodium cholate by weight (KT324, Purina Test Diet, Richmond, IN), as previously described (1-3). Following 6 months on this diet, swine were placed on placebo or AC3174 treatment twice daily and feeding was altered to 0.5 kg twice daily for an additional six months. Water was provided *ad libitum*. Six lean, age-matched Ossabaw miniature swine fed a standard chow diet (5L80, Purina Lab Diet, Richmond, IN) were a control group to verify presence of MetS. Coronary smooth muscle (CSM) cells were isolated from additional lean and MetS swine for acute, *in vitro* assessment of GLP-1 receptor agonist action on intracellular  $Ca^{2+}$  handling (see acute *in vitro* exenatide treatment methods).

***Measurement of intracellular  $Ca^{2+}$  levels.***

CSM were loaded with the fluorescent intracellular  $Ca^{2+}$  indicator, fura-2/AM. Fura-2 loaded cells were placed on a coverslip contained in a constant-flow superfusion chamber mounted on an inverted epifluorescence microscope (model TMS-F, Nikon, Melville, NY), with flow maintained at 1-2 ml/min. Whole cell intracellular  $Ca^{2+}$  levels were assessed as the 360 nm/380 nm excitation ratio of the fura-2 emission at 510 nm at room temperature (22-25 °C), using the InCa++  $Ca^{2+}$  Imaging System (Intracellular Imaging, Cincinnati, OH) as previously described (1;2;4-10). Basal  $Ca^{2+}$  levels were measured in physiologic salt solution (PSS) composed of the following (in mM): 2  $CaCl_2$ , 138 NaCl, 1  $MgCl_2$ , 5 KCl, 10 HEPES, 10 glucose; pH 7.4). Voltage-gated calcium channels were activated by depolarization with high (80 mM)  $K^+$  solution (2  $CaCl_2$ , 63 NaCl, 1 MgCl, 80 KCl, 10 HEPES, 10 glucose; pH 7.4). Sarcoplasmic reticulum (SR)  $Ca^{2+}$  stores were released with 5 mM caffeine in  $Ca^{2+}$ -free solution (138 NaCl, 1  $MgCl_2$ , 5 KCl, 10 HEPES,  $10^{-5}$  M  $K^+$ -EGTA, 10 glucose; pH 7.4).

***Intravenous glucose tolerance testing.***

Briefly, swine were pre-acclimated to sling-restraint. Following an overnight fast, swine were restrained in the low stress sling and baseline blood samples and tail-cuff blood pressures were obtained. Next, glucose (1 g/kg body weight) was administered intravenously as a bolus and timed blood samples were collected. Blood glucose was measured immediately (YSI 2300 STAT Plus Glucose analyzer, YSI Life Sciences, Yellow Springs, OH). Plasma insulin assays were performed offsite (Millipore, Inc., St Charles, MO).

***Intravascular ultrasound.***

After 12 months on diet, following an overnight fast, swine received 2.2 mg/kg xylazine and 5.5 mg/kg telazol, similar to previous reports (1-3;5;11;12). Swine were intubated and anesthesia was maintained at 2-4% isoflurane in 100%  $O_2$  as a carrier gas. A 7 F introducer sheath was inserted into the right femoral artery and heparin (200 U/kg) was administered. A 7 F guiding catheter (Amplatz L, sizes 0.75-2.0; Corndis, Bridgewater, NJ) was advanced to engage either the right or left coronary ostium. A 3.2 F, 40 MHz IVUS catheter (Boston Scientific, Natick, MA) was advanced over a guide wire and positioned in the coronary artery. Automated IVUS pullbacks were performed at 0.5 mm/sec. Angiography was performed throughout the procedure to assist in catheter placement.

SUPPLEMENTARY DATA

**Supplementary Figure 1.** Liraglutide increases SERCA activity in CSM from lean, healthy Ossabaw Swine, and this effect is prevented in the presence of GLP-1 receptor antagonist, Exendin (9-39).

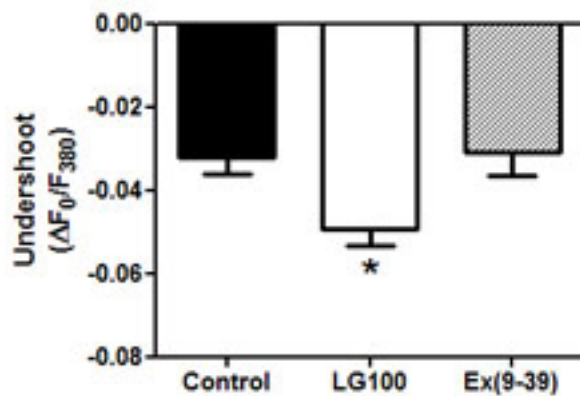

SUPPLEMENTARY DATA

**Supplementary Table S1. Phenotypic Characteristics of Ossabaw Swine Groups.**

| Parameter                             | Lean       | Placebo   |            |           | AC3174     |            |           | Significance, * (p < 0.05) |
|---------------------------------------|------------|-----------|------------|-----------|------------|------------|-----------|----------------------------|
| Week on Treatment                     |            | 0         | 12         | 24        | 0          | 12         | 24        |                            |
| <b>Body Weight</b>                    | 61 ± 6     | 75 ± 3    | 100 ± 2*   | 116 ± 2*  | 73 ± 4     | 87 ± 5     | 100 ± 6*  | Lean < AC3174 < Placebo    |
| <b>Blood Pressure</b>                 |            |           |            |           |            |            |           |                            |
| <i>Systolic (mmHg)</i>                | 143 ± 8    | 149 ± 8   | 151 ± 4    | 170 ± 7   | 132 ± 5    | 149 ± 6    | 152 ± 6   | None                       |
| <i>Diastolic (mmHg)</i>               | 76 ± 5     | 79 ± 5    | 84 ± 3     | 89 ± 5    | 74 ± 4     | 82 ± 5     | 85 ± 4    | None                       |
| <i>Mean Arterial Pressure (mmHg)</i>  | 98 ± 5     | 102 ± 5   | 106 ± 2    | 116 ± 5   | 93 ± 4     | 104 ± 5    | 107 ± 4   | None                       |
| <b>Carbohydrate Metabolism</b>        |            |           |            |           |            |            |           |                            |
| <i>Fasting plasma glucose (mg/dL)</i> | 77 ± 5     | 74 ± 2    | 78 ± 2     | 81 ± 2    | 72 ± 3     | 73 ± 3     | 68 ± 2    | None                       |
| <i>Peak plasma insulin (μU/dL)</i>    | 88 ± 33    | 47 ± 17   | 47 ± 6     | 67 ± 12   | 46 ± 10    | 139 ± 29*  | 122 ± 25* | Placebo < AC3174           |
| <b>Lipids</b>                         |            |           |            |           |            |            |           |                            |
| <i>Total cholesterol (mg/dL)</i>      | 66 ± 10    | 430 ± 95  | 420 ± 68   | 240 ± 20  | 460 ± 78   | 369 ± 65   | 354 ± 61  | Lean < Placebo, AC3174     |
| <i>Triglycerides (mg/dL)</i>          | 29 ± 5     | 67 ± 16   | 46 ± 6     | 41 ± 4*   | 60 ± 6     | 64 ± 13    | 74 ± 7*   | Lean < Placebo < AC3174    |
| <b>Kidney Function</b>                |            |           |            |           |            |            |           |                            |
| <i>BUN (mg/dL)</i>                    | 13 ± 1.0   | 15 ± 1.4  | 13 ± 0.9   | 13 ± 1.2  | 16 ± 1.2   | 14 ± 1.4   | 15 ± 1.2  | None                       |
| <i>Creatinine (mg/dL)</i>             | 1.2 ± 0.09 | 1 ± 0.04  | 0.9 ± 0.05 | 1 ± 0.04  | 1.1 ± 0.09 | 1 ± 0.07   | 1 ± 0.04  | None                       |
| <b>Plasma Proteins</b>                |            |           |            |           |            |            |           |                            |
| <i>Total Protein (g/dL)</i>           | 7.1 ± 0.2  | 6.2 ± 0.4 | 6.7 ± 0.2  | 6.8 ± 0.2 | 6.4 ± 0.4  | 6.8 ± 0.7  | 6.6 ± 0.2 | None                       |
| <i>Albumin (g/dL)</i>                 | 4 ± 0.2    | 3.6 ± 0.1 | 3.6 ± 0.1  | 3.7 ± 0.2 | 3.7 ± 0.1  | 3.9 ± 0.1  | 3.8 ± 0.1 | None                       |
| <i>Globulin (g/DL)</i>                | 3.3 ± 0.2  | 2.9 ± 0.1 | 3.1 ± 0.2  | 3.1 ± 0.1 | 2.8 ± 0.2  | 2.9 ± 0.1  | 2.8 ± 0.1 | None                       |
| <b>Electrolytes</b>                   |            |           |            |           |            |            |           |                            |
| <i>Phosphorus (mg/dL)</i>             | 5.8 ± 0.2  | 7 ± 0.1*  | 6.7 ± 0.2  | 6.2 ± 0.2 | 6.7 ± 0.2* | 6.1 ± 0.2* | 6 ± 0.2   | Lean < Placebo > AC3174    |
| <i>Calcium (mg/dL)</i>                | 10.3 ± 0.1 | 9.7 ± 0.2 | 9.4 ± 0.2  | 9.5 ± 0.3 | 9.7 ± 0.3  | 9.8 ± 0.3  | 9.5 ± 0.2 | None                       |
| <i>Magnesium (mEq/L)</i>              | 1.6 ± 0.1  | 1.8 ± 0.1 | 1.7 ± 0.1  | 1.6 ± 0.1 | 1.7 ± 0.1  | 1.7 ± 0.1  | 1.6 ± 0.1 | None                       |
| <i>Sodium(mEq/L)</i>                  | 140 ± 1    | 140 ± 1   | 137 ± 2    | 139 ± 1   | 141 ± 1    | 137 ± 2    | 138 ± 2   | None                       |
| <i>Potassium (mEq/L)</i>              | 4.3 ± 0.3  | 4.2 ± 0.1 | 4.3 ± 0.1  | 4 ± 0.1   | 4.3 ± 0.1  | 4.2 ± 0.1  | 3.9 ± 0.1 | None                       |
| <i>Chloride (mEq/L)</i>               | 102 ± 1    | 99 ± 1    | 97 ± 1     | 106 ± 8   | 100 ± 1    | 97 ± 1     | 98 ± 1    | None                       |
| <b>Other</b>                          |            |           |            |           |            |            |           |                            |
| <i>Creatine Phosphokinase</i>         | 537 ± 225  | 422 ± 40  | 502 ± 56   | 448 ± 54  | 364 ± 54   | 410 ± 72   | 645 ± 321 | None                       |

Lean control; Placebo = MetS + Placebo treatment; AC3174 = MetS + AC3174 treatment.

## Reference List

1. Edwards JM, Neeb ZP, Alloosh MA, Long X, Bratz IN, Peller CR, Byrd JP, Kumar S, Obukhov AG, Sturek M. Exercise training decreases store-operated  $\text{Ca}^{2+}$  entry associated with metabolic syndrome and coronary atherosclerosis. *Cardiovasc Res* 2010; 85:631-640
2. Neeb ZP, Edwards JM, Alloosh MA, Long X, Mokolke EA, Sturek M. Metabolic syndrome and coronary artery disease in Ossabaw compared with Yucatan swine. *Comp Med* 2010; 60:300-315
3. McKenney ML, Schultz KA, Boyd JH, Byrd JP, Alloosh M, Teague SD, Arce-Esquivel AA, Fain JN, Laughlin MH, Sacks HS, Sturek M. Epicardial adipose excision slows the progression of porcine coronary atherosclerosis. *J Cardiothorac Surg* 2014; 9:2
4. Witczak CA, Wamhoff BR, Sturek M. Exercise training prevents  $\text{Ca}^{2+}$  dysregulation in coronary smooth muscle from diabetic dyslipidemic Yucatan swine. *J Appl Physiol* 2006; 101:752-762
5. Heaps CL, Sturek M, Price EM, Laughlin MH, Parker JL. Sarcoplasmic reticulum  $\text{Ca}^{2+}$ -ATPase uptake is impaired in coronary smooth muscle distal to chronic occlusion. *Am J Physiol : Heart Circ Physiol* 2001; 281:H223-H231
6. Hill BJF, Dixon JL, Sturek M. Effect of atorvastatin on intracellular calcium uptake in coronary smooth muscle cells from diabetic pigs fed an atherogenic diet. *Atherosclerosis* 2001; 159:117-124
7. Hill BJF, Katwa LC, Wamhoff BR, Sturek M. Enhanced endothelin<sub>A</sub> receptor-mediated calcium mobilization and contraction in organ cultured porcine coronary arteries. *J Pharmacol Exp Ther* 2000; 295:484-491
8. Hill BJF, Wamhoff BR, Sturek M. Functional nucleotide receptor expression and sarcoplasmic reticulum morphology in dedifferentiated porcine coronary smooth muscle cells. *J Vasc Res* 2001; 38:432-443
9. Witczak CA, Sturek M. Exercise prevents diabetes-induced impairment in superficial buffer barrier in porcine coronary smooth muscle. *J Appl Physiol* 2004; 96:1069-1079
10. Witczak CA, Sturek M. Training-induced sarcoplasmic reticulum  $\text{Ca}^{2+}$  unloading occurs without  $\text{Ca}^{2+}$  influx. *Med Sci Sports Exerc* 2005; 37:1119-1125
11. Mokolke EA, Dietz NJ, Eckman DM, Nelson MT, Sturek M. Diabetic dyslipidemia and exercise affect coronary tone and differential regulation of conduit and microvessel  $\text{K}^{+}$  current. *Am J Physiol Heart Circ Physiol* 2005; 288:H1233-H1241
12. Long X, Bratz IN, Alloosh M, Edwards JM, Sturek M. Short-term exercise training prevents micro- and macrovascular disease following coronary stenting. *J Appl Physiol* 2010; 108:1766-1774
